# Supplementary material for: Astrocytic CCAAT/Enhancer-binding protein delta contributes to reactive oxygen species formation in neuroinflammation
Source: PubMed Central journal article supplement — Redox Biol. 2018 Feb 16;16:104–12. doi: 10.1016/j.redox.2018.02.011 (PMC5953220; doi:10.1016/j.redox.2018.02.011), 2018-02-16
Supplement: mmc1.pdf [file mmc1.pdf]

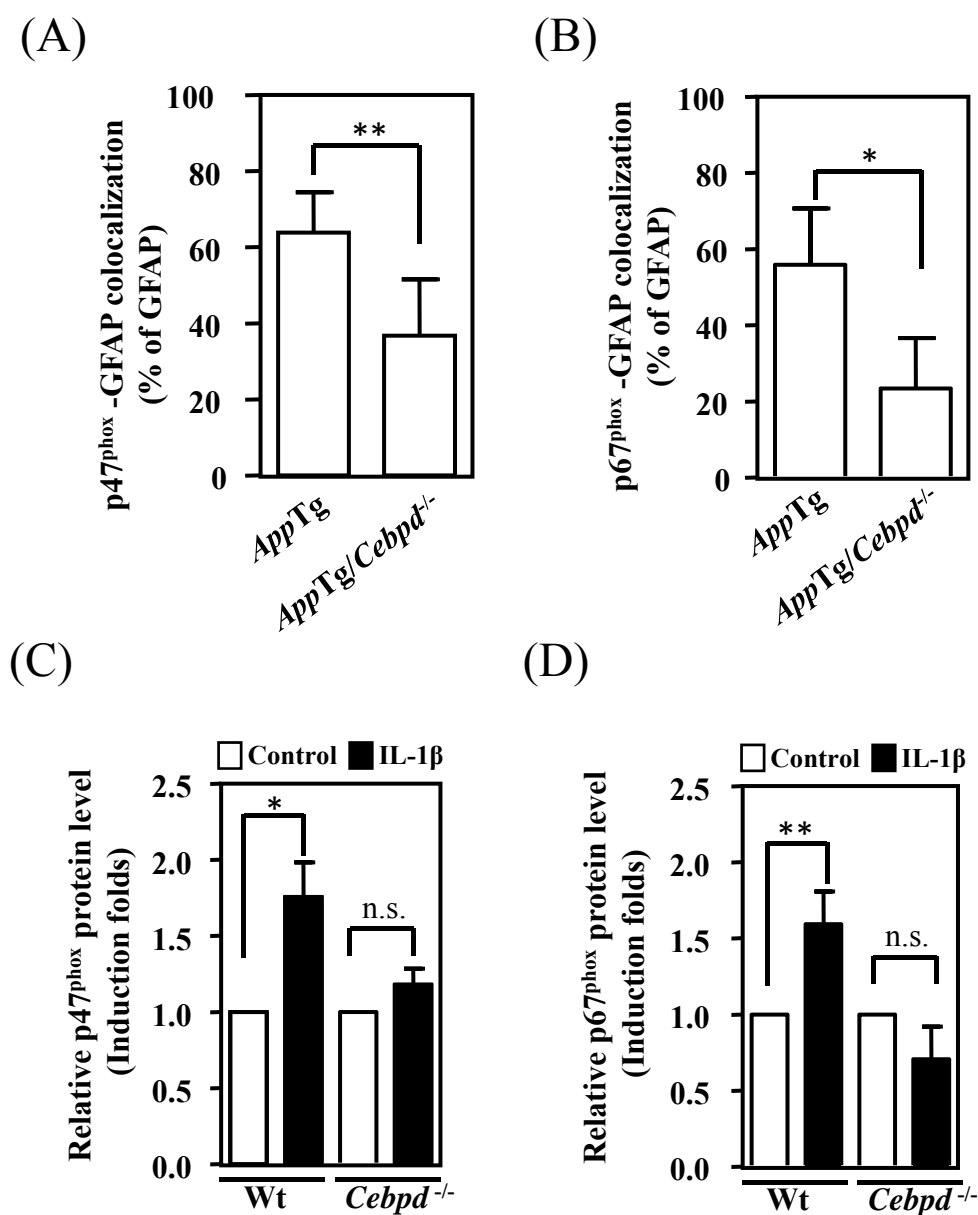

**Supplementary Fig. 1. Quantitation of p47<sup>phox</sup> and p67<sup>phox</sup> expression.** (A) and (B) Quantitative analysis (n=3 for each group) of p47<sup>phox</sup>-GFAP and p67<sup>phox</sup>-GFAP co-localization in *AppTg* and *AppTg/Cebpd*<sup>-/-</sup> mice using ImageJ software. (C) and (D) Quantitative analysis of p47<sup>phox</sup> and p67<sup>phox</sup> protein level by IL-1 $\beta$ -treated wild-type and *Cebpd*<sup>-/-</sup> mice primary astrocyte. The bands were quantified using ImageJ software. n.s. not significant. (\* $p$ <0.05, \*\* $p$ <0.01, Student's  $t$ -test)

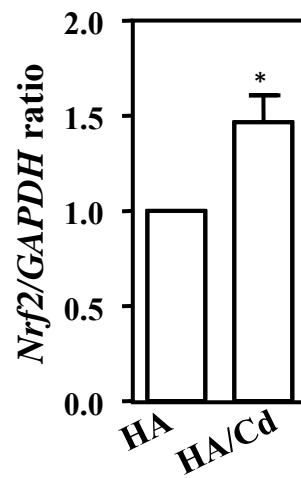

**Supplementary Fig. 2. Cebpd activates *Nrf2* expression in primary astrocytes.** Overexpression of HA/Cebpd (HA-Cd) in primary astrocytes could increase *Nrf2* expression. The total RNA was harvested from Cebpd-overexpressed cells and Q-PCR was conducted with *Nrf2* primers. (\* $p < 0.05$ , Student's *t*-test)

(A)

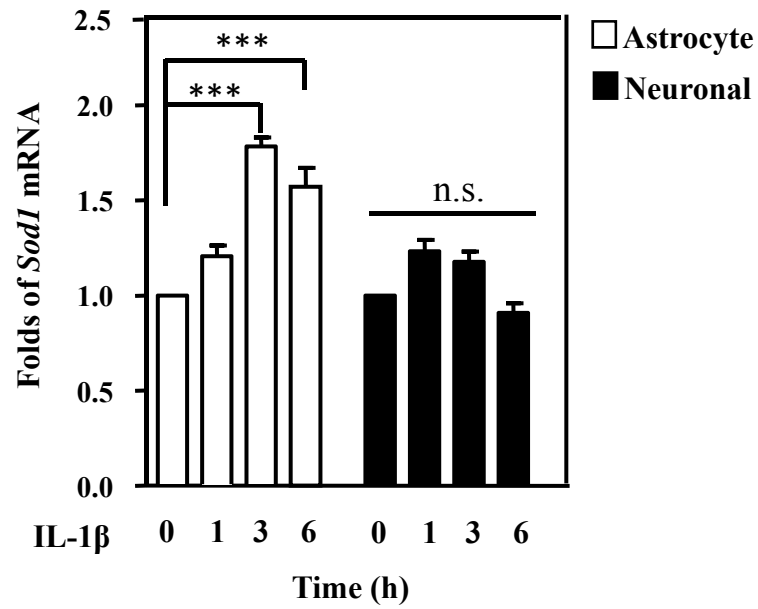

(B)

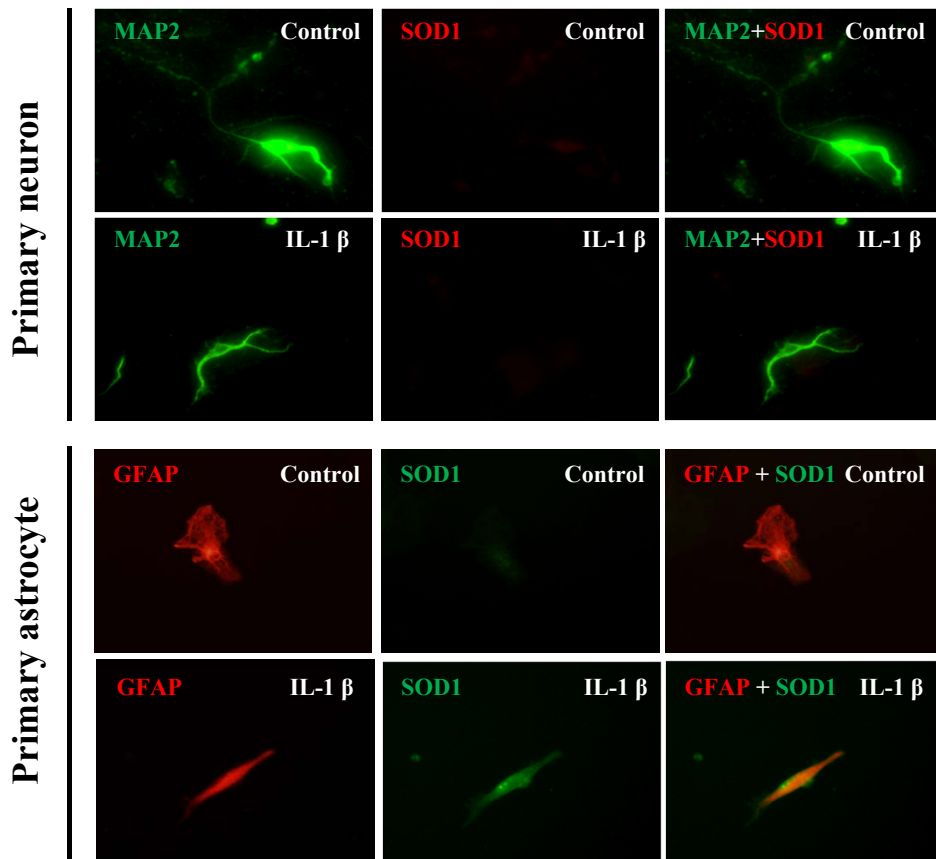

**Supplementary Fig. 3. Compared with primary astrocytes, neuronal Sod1 expression was not increased after IL-1 $\beta$  treatment.** (A) The astrocytic *Sod1* transcription was highly increased after IL-1 $\beta$  treatment, while the neuronal *Sod1* transcription was not induced by IL-1 $\beta$ . The total RNA was harvested from IL-1 $\beta$ -treated primary cells and Q-PCR was conducted with specific primers. (B) Sod1 immunoreactivity co-localized with GFAP, a specific astrocyte marker, and was highly increased by IL-1 $\beta$ , while Sod1 co-localized with MAP2, a specific neuron marker, was not significantly induced after IL-1 $\beta$  treatment. Primary neurons and astrocytes were treated with IL-1 $\beta$  and subjected to immunofluorescence with anti-GFAP, anti-MAP2 and anti-Sod1 antibodies. Similar results were obtained from two independent experiments, each performed in triplicate, and the data shown here were from one representative assay. n.s. not significant. (\*\*\*) $p < 0.001$ , One-way ANOVA)

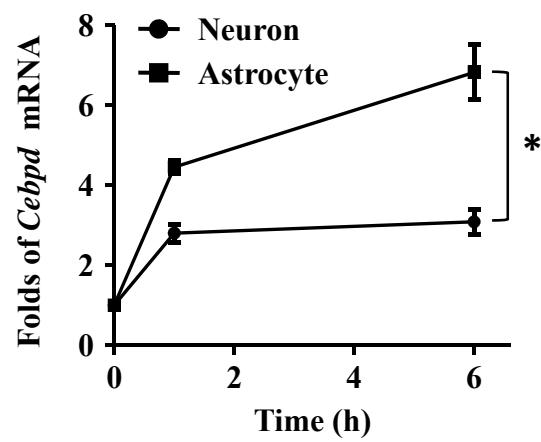

**Supplementary Fig. 4.** IL-1 $\beta$ -induced transcription of *Cebpd* was increased in primary astrocytes compared with primary neuronal cells. The total RNA was harvested from IL-1 $\beta$ -treated cells and Q-PCR was conducted with specific primers. (\* $p$ <0.05, Student's *t*-test)

(A)

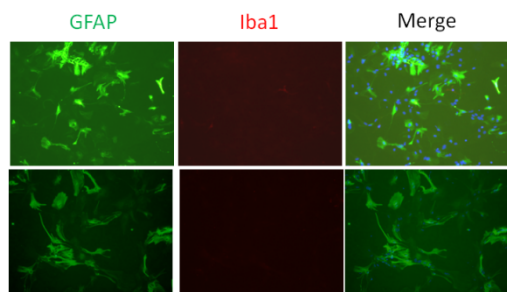

(B)

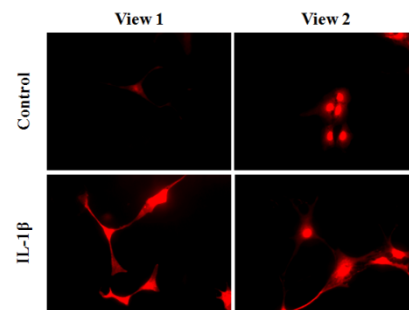

**Supplementary Fig. 5. IL-1 $\beta$  increases mitochondrial superoxide production in primary astrocytes.**

(A) Purity of primary astrocytes culture. Primary mouse astrocytes were stained with astrocyte specific marker, GFAP (green), and microglia specific marker, Iba1 (red). (B) Primary astrocytes were treated with 5 ng/ml IL-1 $\beta$ . After 6 h, the mitochondrial superoxide production was detected with mitochondrial superoxide indicator by immunofluorescent staining.
